# Supplementary material
Source: PubMed Central journal article supplement (PMC5544497)
Supplement: NIHMS868376-supplement-1.pdf [file NIHMS868376-supplement-1.pdf]

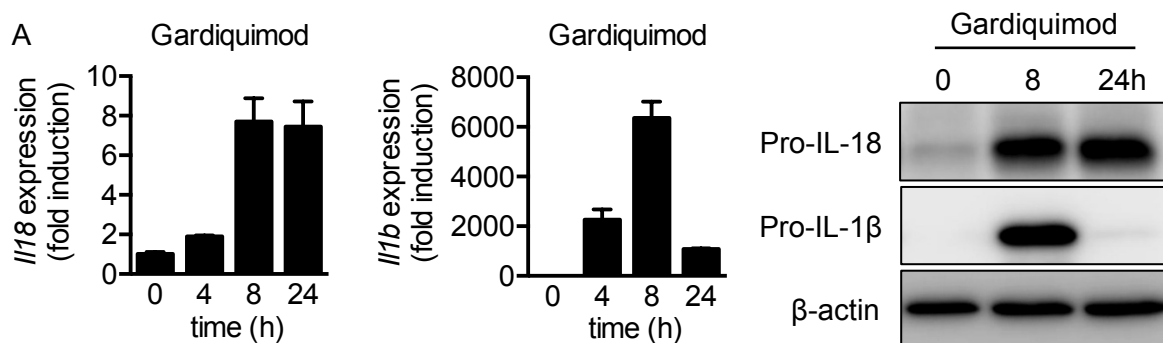

**Supplemental Figure 1. Kinetics of IL-18 and IL-1β expression stimulated by gardiquimod.**

(A) Real-time qPCR analysis of the genes encoding IL-18 and IL-1β and immunoblot analysis of pro-IL-18, pro-IL-1β and β-actin (loading control) in WT BMDMs at various times after treated with gardiquimod. Data are representative of 3 independent experiments.

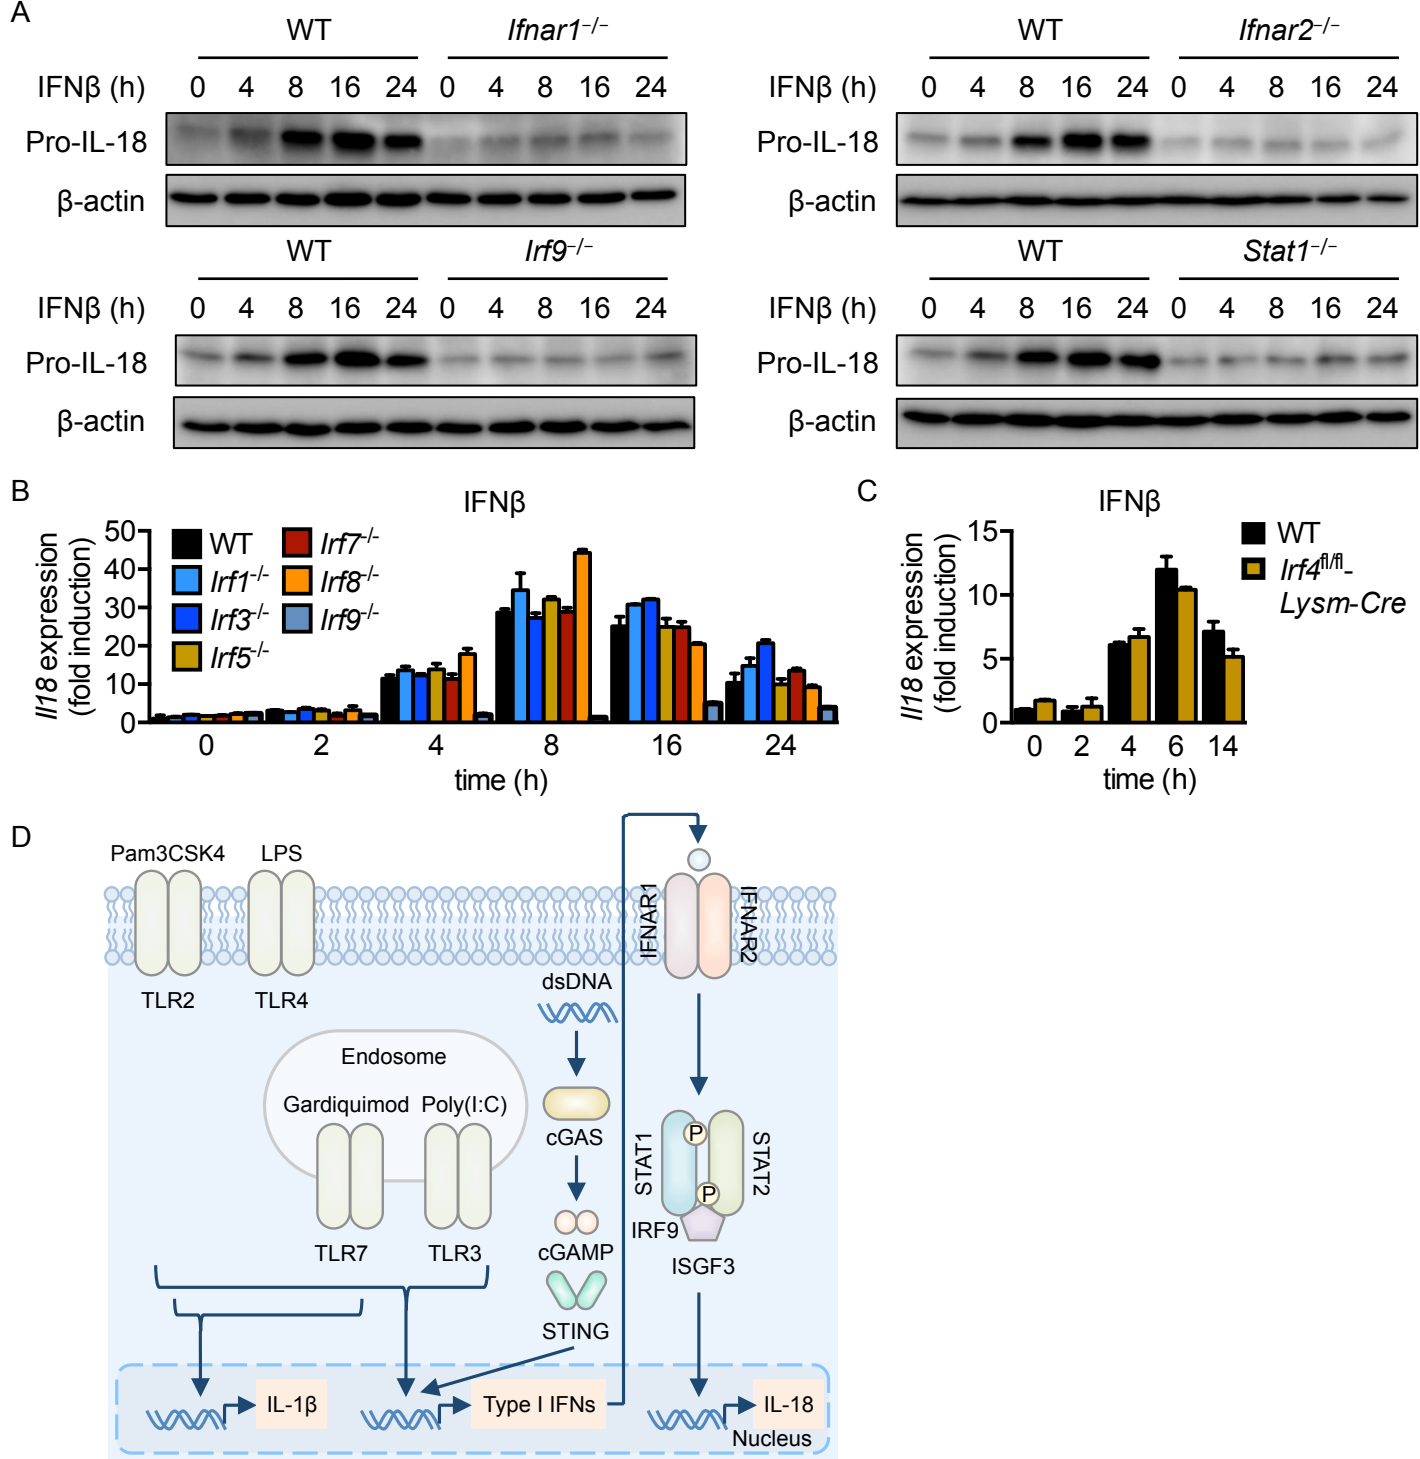

**Supplemental Figure 2. Type I IFNs induce IL-18 expression via ISGF3 and a model of differential regulation of proinflammatory cytokines IL-18 and IL-1 $\beta$ .**

(A) Immunoblot analysis of pro-IL-18 and  $\beta$ -actin (loading control) in WT, *Ifnar2*<sup>-/-</sup>, *Irf9*<sup>-/-</sup> or *Stat1*<sup>-/-</sup> BMDMs at various times after treated with IFN $\beta$ . (B) Real-time qPCR analysis of the gene encoding IL-18 in WT, *Irf1*<sup>-/-</sup>, *Irf3*<sup>-/-</sup>, *Irf5*<sup>-/-</sup>, *Irf7*<sup>-/-</sup> or *Irf8*<sup>-/-</sup> BMDMs at various times after treated with IFN $\beta$ . (C) Real-time qPCR analysis of the gene encoding IL-18 in WT or *Irf4*<sup>fl/fl</sup>-*Lysm-Cre* BMDMs at various times after treated with IFN $\beta$ . (D) Expression of IL-18 is induced and sustained by stimulations of TLR2, TLR4, or TLR7 ligand, while IL-1 $\beta$  expression declines soon after reaching its peak level. The TLR3 and cGAS–STING pathways also upregulate IL-18 expression but are modest at inducing IL-1 $\beta$  expression. Importantly, type I IFN signaling downstream of TLRs and cGAS–STING pathway is crucial in mediating IL-18 induction. Data are representative of 3 independent experiments.
